# Supplementary material
Source: PubMed Central journal article supplement (PMC6817976)
Supplement: NIHMS1055653-supplement-Supplement.pdf [file NIHMS1055653-supplement-Supplement.pdf]

Supplemental Table: Primary diagnoses for patients with and without delirium.

| Primary Diagnoses                                     | Delirium+<br>(Mean $\pm$ STD) |                | Delirium-<br>(Mean $\pm$ STD) |                |
|-------------------------------------------------------|-------------------------------|----------------|-------------------------------|----------------|
|                                                       | UTI+<br>N = 8                 | UTI-<br>N = 22 | UTI+<br>N = 11                | UTI-<br>N = 10 |
| Subdural Hematoma                                     | 0                             | 1              | 0                             | 0              |
| Encephalopathy, Not<br>Otherwise Specified            | 2                             | 1              | 0                             | 0              |
| Dementia                                              | 1                             | 2              | 0                             | 0              |
| Epilepsy                                              | 0                             | 1              | 0                             | 0              |
| Stroke                                                | 1                             | 0              | 0                             | 1              |
| Vasculitis of the<br>Central Nervous<br>System        | 0                             | 1              | 0                             | 0              |
| Meningitis                                            | 1                             | 1              | 0                             | 0              |
| Multiple Sclerosis                                    | 0                             | 0              | 1                             | 1              |
| Intracranial lesion<br>(Idiopathic)                   | 0                             | 0              | 0                             | 1              |
| Intracranial<br>Neoplasm                              | 0                             | 2              | 1                             | 0              |
| Normal Pressure<br>Hydrocephalus                      | 0                             | 0              | 1                             | 1              |
| Cerebrospinal Fluid<br>Leak                           | 1                             | 0              | 0                             | 1              |
| Myelitis                                              | 0                             | 0              | 2                             | 0              |
| Disc disease                                          | 0                             | 0              | 1                             | 1              |
| Amyotrophic Lateral<br>Sclerosis                      | 0                             | 0              | 0                             | 1              |
| Acute Inflammatory<br>Demyelinating<br>Polyneuropathy | 0                             | 0              | 0                             | 2              |
| Myasthenia Gravis                                     | 0                             | 0              | 1                             | 0              |
| Oculopharyngeal<br>Muscular Dystrophy                 | 0                             | 0              | 0                             | 1              |
| Steroid Myopathy                                      | 0                             | 1              | 0                             | 0              |
| Cardiac Arrest                                        | 0                             | 1              | 0                             | 0              |
| Myocardial                                            | 0                             | 1              | 0                             | 0              |

|                                    |   |   |   |   |
|------------------------------------|---|---|---|---|
| Infarction                         |   |   |   |   |
| Chronic Heart Failure              | 0 | 1 | 0 | 0 |
| Pneumonia                          | 0 | 2 | 0 | 0 |
| Hepatic Encephalopathy             | 0 | 3 | 0 | 0 |
| Hyponatremia                       | 0 | 1 | 0 | 0 |
| Urinary Tract Infection            | 1 | 0 | 0 | 0 |
| Pyelonephritis                     | 0 | 0 | 3 | 0 |
| Sepsis                             | 1 | 0 | 1 | 0 |
| Hemophagocytic Lymphohistiocytosis | 0 | 1 | 0 | 0 |
| Neoplasm, Other                    | 0 | 1 | 0 | 0 |
| Limb Ischemia                      | 0 | 1 | 0 | 0 |
